# Atrial fibrillation and gastroesophageal reflux disease: the cardiogastric interaction

Dominik Linz<sup>1\*</sup>, Mathias Hohl<sup>1</sup>, Johanna Vollmar<sup>2</sup>, Christian Ukena<sup>1</sup>, Felix Mahfoud<sup>1</sup>, and Michael Böhm<sup>1</sup>

<sup>1</sup>Klinik für Innere Medizin III, Kardiologie, Angiologie und Internistische Intensivmedizin, Universitätsklinikum des Saarlandes, Kirrberger Str. 1, Geb. 40, Homburg, Saar D-66421, Germany; and <sup>2</sup>Gastroenterologie, Hepatologie, Nephrologie, Rheumatologie, Infektiologie, Endokrinologie und Stoffwechselerkrankungen, Universitätsklinikum Mainz, Mainz, Germany

Received 12 December 2015; accepted after revision 14 March 2016; online publish-ahead-of-print 31 May 2016

Atrial fibrillation (AF) is the most common sustained arrhythmia and is associated with significant morbidity and mortality. Multiple conditions like hypertension, heart failure, diabetes, sleep apnoea, and obesity play a role for the initiation and perpetuation of AF. Recently, a potential association between gastroesophageal reflux disease (GERD) and AF development has been proposed due to the close anatomic vicinity of the oesophagus and the left atrium. As an understanding of the association between acid reflux disease and AF may be important in the global multimodal treatment strategy to further improve outcomes in a subset of patients with AF, we discuss potential atrial arrhythmogenic mechanisms in patients with GERD, such as gastric and subsequent systemic inflammation, impaired autonomic stimulation, mechanical irritation due to anatomical proximity of the left atrium and the oesophagus, as well as common comorbidities like obesity and sleep-disordered breathing. Data on GERD and oesophageal lesions after AF-ablation procedures will be reviewed. Treatment of GERD to avoid AF or to reduce AF burden might represent a future treatment perspective but needs to be scrutinized in prospective trials.

**Keywords** Atrial fibrillation • Gastroesophageal reflux • Autonomic nervous system • Pulmonary vein isolation

## Introduction

Atrial fibrillation (AF) is prevalent in 1–2% of the general population, and the number of affected individuals is expected to double or triple within the next two to three decades<sup>1–3</sup> related to the ageing of the population, an inappropriate control of cardiovascular risk factors like hypertension and potentially better treatment options of other conditions like coronary heart disease or heart failure.<sup>4</sup> AF doubles mortality<sup>4–6</sup> and causes marked morbidity<sup>7–9</sup> and reduces quality of life.<sup>10–13</sup> Multiple conditions like hypertension, heart failure, diabetes, sleep apnoea, and obesity play a role for the initiation and perpetuation of AF. Importantly, treatment of these conditions has been shown to prevent recurrence and progression of AF and improve outcome of AF-ablation.<sup>14</sup>

An association between AF and disorders of the gastrointestinal tract has been suggested.<sup>15–18</sup> Particularly due to the close vicinity of the oesophagus and the left atrium, an interaction between oesophageal diseases, e.g. gastroesophageal reflux disease (GERD) and oesophagitis and AF has been proposed. Interestingly, in patients with GERD, episodes of AF triggered by defaecation, abdominal bloating, alcohol, cold water, and fatty food consumption

(so called prandial or triggered AF) were reported.<sup>15,16</sup> This temporal relationship further suggests a causal relationship in some of these patients. As understanding of the association between acid reflux disease and AF may be important in the global multimodal treatment strategy to improve outcomes in a subset of patients with AF, we discuss potential GERD-associated arrhythmogenic mechanisms like impaired autonomic stimulation, mechanical irritation due to anatomical proximity of the left atrium, and the oesophagus and local inflammation. Additionally, oesophageal lesions after AF-ablation procedures and the role of proton pump inhibitors (PPIs) will be highlighted.

## Anatomic atrial–oesophageal relationship

The posterior wall of the left atrium and the oesophagus are separated by a tissue layer of only ~5 mm. The exact anatomical relationship between oesophagus and atrium is not fixed.<sup>19</sup> It has been reported that oesophagus location is different in computer tomography scans before procedure and during contrast oesophagogram

\* Corresponding author. Tel: +49 6841 16 21333; fax: +496841 16 21321. E-mail address: dominik.linz@gmx.de

Published on behalf of the European Society of Cardiology. All rights reserved. © The Author 2016. For permissions please email: journals.permissions@oup.com.

during procedures. In some patients, oesophagus is close to left pulmonary vein, while others are close to right pulmonary vein.<sup>20</sup> Oesophageal vessels and lymph nodes as well as the paraoesophageal nerve plexus are located within this tissue layer. The paraoesophageal nerve plexus regulates the motility of the stomach and can branch above or below the level of the left atrium. A representative magnetic resonance image is shown in *Figure 1*.

## GERD and AF

The relationship between gastrointestinal symptoms and arrhythmias was first described by Ludwig Roemheld, under the name of 'Roemheld gastrocardiac syndrome', in which an oesophago-gastric stimulus was able to induce arrhythmia-related symptoms.<sup>18</sup> The presence of GERD might increase the risk of AF by 39% in a small-scale population<sup>21</sup> and impact of GERD on incident AF in about 30 000 people from the 1 000 000-person cohort data set sampled from the Taiwan National Health Insurance database has been demonstrated.<sup>22</sup> GERD was independently associated with an increased risk of future AF within 3 years in this nationwide population-based cohort (HR 1.31; 95% CI 1.06–16.1).<sup>22</sup> On the contrary, conflicting results were reported by using a self-report questionnaire to assess the frequency of GERD in 5288 residents of Olmsted County.<sup>23</sup> Herein, GERD was not associated with risk of AF after adjustment for other risk factors. However, acid reflux disease significantly increased the risk of AF only in the presence of oesophagitis (HR 1.94, 95% CI 1.35–2.78).<sup>23</sup>

Additionally, some studies have demonstrated that gastric acid suppressive therapy by PPIs may help to ameliorate symptoms associated with AF and also facilitate conversion from AF to sinus rhythm in a subset of patients indirectly suggesting a causal relationship. In 18 patients with GERD and paroxysmal AF who complained

of retrosternal and epigastric pain, treatment with PPIs either completely stopped or decreased the frequency of AF episodes.<sup>17</sup> In a pilot study, PPI therapy led to a decrease in AF symptoms in 78% of cases with AF and reflux oesophagitis and the antiarrhythmic drug treatment could be discontinued in 28% of the patients.<sup>24</sup> In patients with GERD undergoing simultaneous Holter ECG and 24 h pH monitoring, all patients on PPI treatment showed a reduction in arrhythmia burden.<sup>25</sup> The relationship between GERD and the arrhythmia and the efficacy of PPIs on symptoms of GERD and arrhythmias was validated with questionnaires and endoscopy to scrutinize the diagnosis of GERD.<sup>26</sup> In this case–control study, 32 patients with GERD and arrhythmias were included. Holter ECG was performed for each patient during oesophageal manometry, acid perfusion, and 24 h pH monitoring. In 56% of all patients with GERD and AF, a correlation between oesophageal pH and heart rate variability was achieved and PPI treatment reduced cardiac-specific symptoms in these patients.<sup>27</sup>

In a prospective case–control study of patients undergoing AF catheter ablation, patients with GERD and/or irritable bowel syndrome were more likely to have self-reported triggered AF (defaecation, abdominal bloating, alcohol, cold water, and fatty food consumption), a positive vagal response during radio frequency catheter ablation and independent firing from pulmonary veins. Electroanatomical mapping, quantifying structural changes in the atrium, revealed no increase in left-atrial scar when compared with age-matched controls.<sup>27</sup> These data suggest that not structural changes in the atrium but autonomic changes associated with the activation of the ganglionated plexi and an increase in focal discharges in the pulmonary veins play the causative role for the initiation and perpetuation of AF in GERD. These data are based on a small sample size. However, the evidence for beneficial antiarrhythmic effects of PPI-treatment comes from small

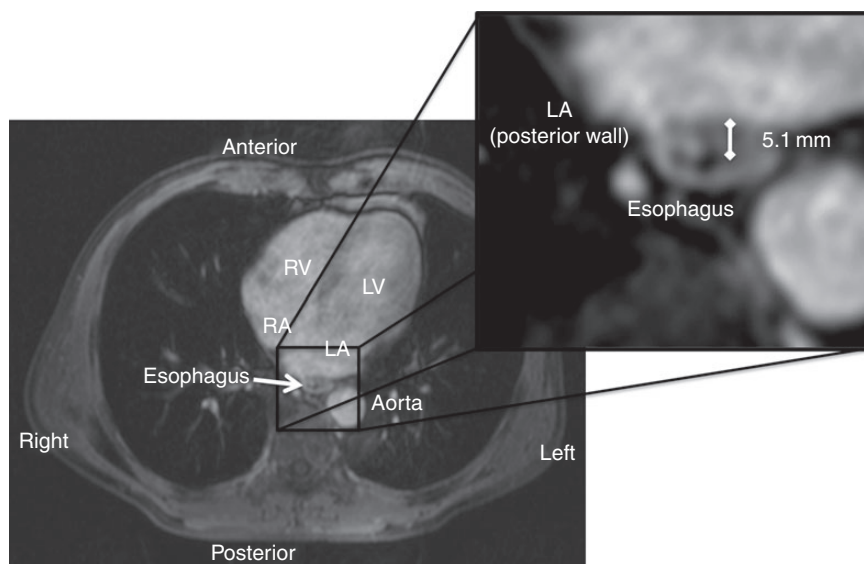

**Figure 1** Transverse cross-sectional overview (left) of the thorax at the level of the heart (magnetic resonance imaging). In the right upper figure, the regional relationship between the oesophagus and the posterior wall of the left atrium is depicted. (LA, left atrium; RA, right atrium; LV, left ventricle; RV, right ventricle).

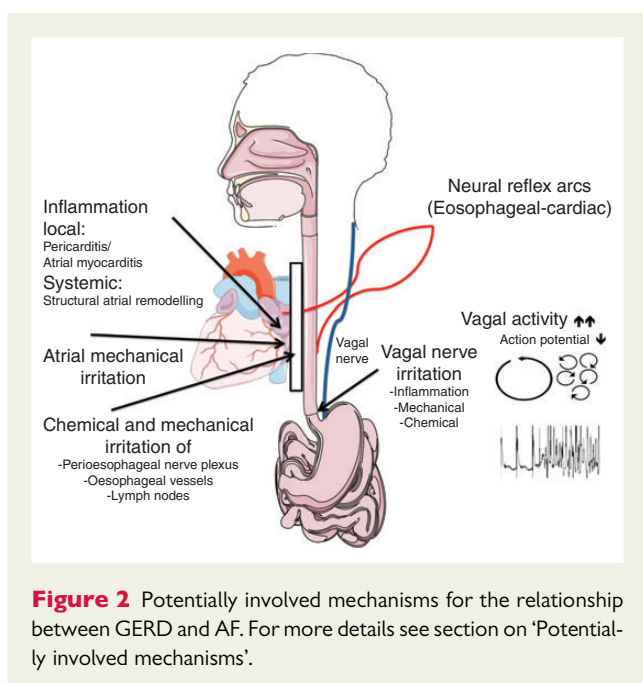

retrospective and observational studies and requires further validation by large prospective trials.

## Potentially involved mechanisms

Figure 2 summarizes the potentially involved mechanisms for the relationship between GERD and AF.

### Autonomic activation

Neural reflex arcs from the esophagus and the heart have been shown in both animals and humans. In humans, chemical, electrical, and mechanical stimulation of the esophagus modifies the sympathovagal balance.<sup>28</sup> Oesophageal stimulation amplifies respiratory-driven cardiac vagoafferent modulation, while decreasing sympathetic modulation.<sup>28</sup> Oesophageal acid stimulation is further associated with an increase in vagal activity.<sup>29</sup> Acid refluxes cause a local inflammatory process that may directly alter the autonomic innervations of the oesophageal mucosa and may also penetrate the oesophageal wall and stimulate the adjacent vagal nerves. Injury of the distal esophagus can further impair vagal nerve responses, particularly nerve sensitization of the afferent pathways.<sup>30</sup> These and other considerations suggest the involvement of the cardio-oesophageal reflex in case of GERD associated AF.

Several observations support the relevant role of the autonomic nervous system for the initiation and the maintenance of AF.<sup>31</sup> Studies in lone AF patients and in animal models of intermittent rapid atrial pacing and congestive heart failure have indicated that AF onset is associated with simultaneous sympathovagal activation rather than with an increase in vagal or sympathetic drive alone.<sup>32,33</sup> On the cellular level, cholinergic muscarinic receptors are the primary mediators of parasympathetic control of heart function. Muscarin-2 receptor (M2R) stimulation with acetylcholine directly activates G-protein-dependent potassium currents leading to a shortening of the atrial action potential duration and atrial effective refractory period.<sup>34</sup> Additionally, the effect of vagal stimulation on

atrial refractoriness is heterogeneous because of heterogeneity in the distribution of parasympathetic nerve endings and/or M2Rs. Increased vagal activation, as present in GERD-patients, creates an arrhythmogenic substrate for re-entry and, thereby, increases AF-susceptibility.<sup>31,34</sup>

### Inflammation

Observational studies also suggest that not symptoms of GERD in general but more specifically endoscopic evidence of oesophagitis is associated with increased risk for AF and may cause and maintain arrhythmias.<sup>24,25</sup> Propagation of the local inflammatory process through the oesophageal wall may also cause local pericarditis or atrial myocarditis due to the proximity of the esophagus to the left atrium. In patients with so-called lone AF (AF without structural heart disease), myocarditis can be identified in up to 66%.<sup>35</sup> Circulating inflammatory cytokines have been shown to play a role in the pathophysiology of AF.<sup>34</sup> Inflammation of the oesophageal mucosa affects local receptors that may induce afferent–efferent reflex mechanisms.<sup>36</sup>

### Cardiac perfusion

The effect of oesophageal acid stimulation on coronary blood flow was investigated in 14 patients with angiographically documented significant coronary artery disease and in 18 heart transplant recipients. Oesophageal acid stimulation can cause anginal attacks and significantly reduce coronary blood flow in patients with coronary artery disease. The lack of such an effect in heart transplant recipients with complete heart denervation suggests the involvement of a neural reflex.<sup>37</sup> While ventricular ischaemia impacts left-ventricular contractility and relaxation, reduced cardiac perfusion may also affect atria predisposing to structural alterations including myocyte loss and scarring leading to substrates for atrial arrhythmias.<sup>38</sup>

### Hiatus hernia

Hiatus hernia is associated with increased occurrence of GERD symptoms.<sup>39</sup> Whether the presence of hiatus hernia further increase the risk of AF is unknown. A hiatus hernia as well as an intrathoracic stomach, representing the end stage of a hiatal hernial diaphragm, has the potential to mechanically irritate the left atrium. Additionally, the hernia may increase reflux and, thereby, result in oesophagitis accompanied by AF. The association between hiatus hernia and atrial tachyarrhythmias has been described as increases in atrial ectopic beats upon swallowing in a patient with a big hiatus hernia.<sup>40</sup> Interestingly, there are case reports that repair of a large paraoesophageal hernia<sup>41</sup> or an intrathoracic stomach<sup>42</sup> can suppress paroxysmal atrial arrhythmias.

### Comorbidities: obesity and sleep-disordered breathing

Comorbidities like obesity and sleep-disordered breathing<sup>43</sup> are highly prevalent in GERD-patients and may be associated with the development of AF by systemic changes related to these conditions.

There is a 3–8% higher risk of new AF-onset with each unit increase in body mass index, and this association is independent of other cardiovascular risk factors.<sup>5</sup> Pericardial fat is associated with the occurrence of AF, persistence of AF, left-atrial enlargement, and worse outcomes of AF ablation.<sup>44</sup> Additionally, obesity results in progressive atrial structural and electrical remodelling. In sheep, following a high-calorie diet, obesity was associated with atrial

electro-structural remodelling, increased atrial size, changes in conduction, and more persistent AF episodes. Obesity was associated with reduced posterior left-atrial endocardial voltage and infiltration of contiguous posterior left-atrial muscle by epicardial fat.<sup>45</sup> Whether the anatomical proximity of the posterior wall of the left atrium and the oesophagus play a role for the development of this potential substrate for AF is unknown. In obese patients, risk factor management according to American Heart Association/American College of Cardiology guidelines improved the long-term success of AF ablation.<sup>46,47</sup>

Besides obesity, sleep-disordered breathing is frequently diagnosed in patients with GERD symptoms. The prevalence of GERD in obstructive sleep apnoea (OSA) patients is significantly higher than the general population<sup>48,49</sup> and treatment of OSA has been shown to improve symptoms of GERD.<sup>50</sup> In patients with OSA, ineffective inspiration against the occluded upper airways during obstructive respiratory events cause intrathoracic pressure swings.<sup>51</sup> This may impact the sphincter function of the oesophagus, increasing the occurrence of GERD. OSA can also result in myocardial stretch of the heart chambers and changes in transmural pressure gradients.<sup>51</sup> Obstructive respiratory events are associated with intermittent apnoea-associated hypoxaemia and hypercapnia as well as sympathetic activation and subsequent haemodynamic fluctuations.<sup>52</sup> Long-term OSA has been shown to be associated with atrial remodelling characterized by atrial enlargement and local conduction disturbances in patients with AF.<sup>53</sup> Additionally, acute obstructive respiratory events cause pronounced shortening in atrial refractoriness and result in increased occurrence of spontaneous premature atrial contractions, representing potent triggers for spontaneous AF-episodes in a pig model for OSA and humans.<sup>54</sup> Treatment of sleep-disordered breathing in AF-patients reduces recurrence of AF after electrical cardioversion<sup>55</sup> and improves outcome after pulmonary vein isolation.<sup>56,57,58</sup> Although nocturnal gastroesophageal reflux has been observed in patients with OSA, no coincidence and sequence in time of arousal, apnoea, and reflux events could be identified in a previous mechanistic clinical study.<sup>59</sup>

The true role of comorbidities like obesity and sleep-disordered breathing, and whether interventions like weight loss or sleep apnoea-treatment, experience antiarrhythmic effects by affecting GERD in AF-patients is speculative and need to be investigated in future studies.

## Inflammatory bowel disease and coeliac disease

Besides GERD, also other conditions of chronic inflammation like inflammatory bowel disease may be associated with increased AF-occurrence.<sup>60</sup> Inflammation activity, which is enhanced in chronic inflammatory bowel disease, may play a role in the development of AF. Active inflammatory bowel disease is associated with increased risk of AF and stroke.<sup>60,61</sup> One study showed an increase in electrocardiographic P-wave dispersion in patients with inflammatory bowel disease, which is considered an AF risk factor.<sup>62</sup>

AF is more common both before and after coeliac disease diagnosis in patients with coeliac disease though the excess risk is small.<sup>63</sup> However, in a population-based study of patients with coeliac

disease, failed mucosa healing was not associated with an increased risk of AF.<sup>64</sup> Echocardiographic studies revealed a more pronounced atrial remodelling in patients with coeliac disease, characterized by slower atrial electrical conduction and higher atrial electromechanical delays,<sup>65</sup> while atrial mechanical function was preserved.<sup>66</sup> Potential explanations for the increased risk of AF in coeliac disease include chronic inflammation and shared risk factors.

Additional studies are needed to clarify the link between AF and conditions of chronically increased inflammation like inflammatory bowel disease and autoimmune diseases such as coeliac disease.

## Conclusions

Clinicians should be aware of the possible cardiogastric interaction with GERD being associated with AF. Identification and appropriate treatment of GERD, especially oesophagitis, may help to reduce AF-onset and -symptoms and can facilitate conversion from AF to sinus rhythm in a subset of patients. Further prospective and well-designed studies are needed to determine whether (i) there is a true causal relationship, independent of comorbidities like obesity and sleep-disordered breathing, (ii) the PPI treatment can reduce AF-related symptoms and progression of AF, and (iii) other chronic gastrointestinal diseases like inflammatory bowel disease and coeliac disease play a role for the development of an arrhythmogenic substrate in the atrium.

**Conflict of interest:** none declared.

## References

1. Stewart S, Hart CL, Hole DJ, McMurray JJ. Population prevalence, incidence, and predictors of atrial fibrillation in the Renfrew/Paisley study. *Heart* 2001;**86**:516–21.
2. Stewart S, Hart CL, Hole DJ, McMurray JJ. A population-based study of the long-term risks associated with atrial fibrillation: 20-year follow-up of the Renfrew/Paisley study. *Am J Med* 2002;**113**:359–64.
3. Miyasaka Y, Barnes ME, Gersh BJ, Cha SS, Bailey KR, Abhayaratna WP *et al*. Secular trends in incidence of atrial fibrillation in Olmsted County, Minnesota, 1980 to 2000, and implications on the projections for future prevalence. *Circulation* 2006;**114**:119–25.
4. Camm AJ, Lip GY, De Caterina R, Savelieva I, Atar D, Hohnloser SH *et al*. 2012 focused update of the ESC Guidelines for the management of atrial fibrillation: an update of the 2010 ESC Guidelines for the management of atrial fibrillation—developed with the special contribution of the European Heart Rhythm Association. *Europace* 2012;**14**:1385–413.
5. Bornstein NM, Aronovich BD, Karepov VG, Gur AY, Treves TA, Oved M *et al*. The Tel Aviv Stroke Registry. 3600 consecutive patients. *Stroke* 1996;**27**:1770–3.
6. Kaarisalo MM, Immonen-Räihä P, Marttila RJ, Salomaa V, Kaarsalo E, Salmi K *et al*. Atrial fibrillation and stroke. Mortality and causes of death after the first acute ischemic stroke. *Stroke* 1997;**28**:311–5.
7. Lin HJ, Wolf PA, Kelly-Hayes M, Beiser AS, Kase CS, Benjamin EJ *et al*. Stroke severity in atrial fibrillation. The Framingham Study. *Stroke* 1996;**27**:1760–4.
8. Benjamin EJ, Wolf PA, D'Agostino RB, Silbershatz H, Kannel WB, Levy D. Impact of atrial fibrillation on the risk of death: the Framingham Heart Study. *Circulation* 1998;**8**:946–52.
9. Marini C, De Santis F, Sacco S, Russo T, Olivieri L, Totaro R *et al*. Contribution of atrial fibrillation to incidence and outcome of ischemic stroke: results from a population-based study. *Stroke* 2005;**36**:1115–9.
10. Thrall G, Lane D, Carroll D, Lip GY. Quality of life in patients with atrial fibrillation: a systematic review. *Am J Med* 2006;**119**:448e1–448e19.
11. Wilhelmsen L, Rosengren A, Lappas G. Hospitalizations for atrial fibrillation in the general male population: morbidity and risk factors. *J Intern Med* 2001;**250**:382–9.
12. Singh SN, Tang XC, Singh BN, Dorian P, Reda DJ, Harris CL *et al*. Quality of life and exercise performance in patients in sinus rhythm versus persistent atrial fibrillation: a Veterans Affairs Cooperative Studies Program Substudy. *J Am Coll Cardiol* 2006;**48**:721–30.
13. Hagens VE, Ranchor AV, Van Sonderen E, Bosker HA, Kamp O, Tijssen JG *et al*. Effect of rate or rhythm control on quality of life in persistent atrial fibrillation. Results



- from the Rate Control versus Electrical Cardioversion (RACE) Study. *J Am Coll Cardiol* 2004;**43**:241–7.
14. Schoonderwoerd BA, Smit MD, Pen L, Van Gelder IC. New risk factors for atrial fibrillation: causes of 'not-so-lone atrial fibrillation'. *Europace* 2008;**10**:668–73.
  15. Gillinov AM, Rice TW. Prandial atrial fibrillation: off-pump pulmonary vein isolation with hiatal hernia repair. *Ann Thorac Surg* 2004;**78**:1836–8.
  16. Gordon J, Saleem SM, Ngaage DL, Thorpe JA. Swallow syncope associated with paroxysmal atrial fibrillation. *Eur J Cardiothorac Surg* 2002;**21**:587–90.
  17. Stöllberger C, Finsterer J. Treatment of esophagitis/vagitis-induced paroxysmal atrial fibrillation by proton-pump inhibitors. *J Gastroenterol* 2003;**38**:1109.
  18. Jervell O, Lørdøen O. The gastroduodenal syndrome. *Acta Med Scand Suppl* 1952;**266**:595–9.
  19. Daoud EG, Hummel JD, Houmsse M, Hart DT, Weiss R, Liu Z et al. Comparison of computed tomography imaging with intraprocedural contrast esophagram: implications for catheter ablation of atrial fibrillation. *Heart Rhythm* 2008;**5**:975–80.
  20. Tsao HM, Wu MH, Higa S, Lee KT, Tai CT, Hsu NW et al. Anatomic relationship of the esophagus and left atrium: implication for catheter ablation of atrial fibrillation. *Chest* 2005;**128**:2581–7.
  21. Kunz JS, Hemann B, Edwin Atwood J, Jackson J, Wu T, Hamm C. Is there a link between gastroesophageal reflux disease and atrial fibrillation? *Clin Cardiol* 2009;**32**:584–7.
  22. Huang CC, Chan WL, Luo JC, Chen YC, Chen TJ, Chung CM et al. Gastroesophageal reflux disease and atrial fibrillation: a nationwide population-based study. *PLoS One* 2012;**7**:e47575.
  23. Bunch TJ, Packer DL, Jahangir A, Locke GR, Talley NJ, Gersh BJ et al. Long-term risk of atrial fibrillation with symptomatic gastroesophageal reflux disease and esophagitis. *Am J Cardiol* 2008;**102**:1207–11.
  24. Weigl M, Gschwantler M, Gatterer E, Finsterer J, Stöllberger C. Reflux esophagitis in the pathogenesis of paroxysmal atrial fibrillation: results of a pilot study. *South Med J* 2003;**96**:1128–32.
  25. Gerson LB, Friday K, Triadafilopoulos G. Potential relationship between gastroesophageal reflux disease and atrial arrhythmias. *J Clin Gastroenterol* 2006;**40**:828–32.
  26. Cuomo R, De Giorgi F, Adinolfi L, Sarnelli G, Loffredo F, Efficie E et al. Oesophageal acid exposure and altered neurocardiac function in patients with GERD and idiopathic cardiac dysrhythmias. *Aliment Pharmacol Ther* 2006;**24**:361–70.
  27. Reddy YM, Singh D, Nagarajan D, Pillarisetti J, Biria M, Boolani H et al. Atrial fibrillation ablation in patients with gastroesophageal reflux disease or irritable bowel syndrome—the heart to gut connection! *J Interv Card Electrophysiol* 2013;**37**:259–65.
  28. Tougas G, Kamath M, Watteel G, Fitzpatrick D, Fallen EL, Hunt RH et al. Modulation of neurocardiac function by oesophageal stimulation in humans. *Clin Sci (Lond)* 1997;**92**:167–74.
  29. Tougas G, Spaziani R, Hollerbach S, Djuric V, Pang C, Upton AR et al. Cardiac autonomic function and oesophageal acid sensitivity in patients with non-cardiac chest pain. *Gut* 2001;**49**:706–12.
  30. Shaker R. Gastroesophageal reflux disease: beyond mucosal injury. *J Clin Gastroenterol* 2007;**41**:160–2.
  31. Linz D, Ukena C, Mahfoud F, Neuberger HR, Böhm M. Atrial autonomic innervation: a target for interventional antiarrhythmic therapy? *J Am Coll Cardiol* 2014;**63**:215–24.
  32. Jayachandran JV, Sih HJ, Winkle W, Zipes DP, Hutchins GD, Olgin JE. Atrial fibrillation produced by prolonged rapid atrial pacing is associated with heterogeneous changes in atrial sympathetic innervation. *Circulation* 2000;**101**:1185–91.
  33. Tan AY, Zhou S, Ogawa M, Song J, Chu M, Li H et al. Neural mechanisms of paroxysmal atrial fibrillation and paroxysmal atrial tachycardia in ambulatory canines. *Circulation* 2008;**118**:916–25.
  34. Schotten U, Verheule S, Kirchhof P, Goette A. Pathophysiological mechanisms of atrial fibrillation: a translational appraisal. *Physiol Rev* 2011;**91**:265–325.
  35. Frustaci A, Chimenti C, Bellocci F, Morgante E, Russo MA, Maseri A. Histological substrate of atrial biopsies in patients with lone atrial fibrillation. *Circulation* 1997;**96**:1180–4.
  36. Newton M, Kamm MA, Soediono PO, Milner P, Burnham WR, Burnstock G. Oesophageal epithelial innervation in health and reflux oesophagitis. *Gut* 1999;**44**:317–22.
  37. Chauhan A, Mullins PA, Taylor G, Petch MC, Schofield PM. Cardioesophageal reflex: a mechanism for 'linked angina' in patients with angiographically proven coronary artery disease. *J Am Coll Cardiol* 1996;**27**:1621–8.
  38. Nishida K, Qi XY, Wakili R, Comtois P, Chartier D, Harada M et al. Mechanisms of atrial tachyarrhythmias associated with coronary artery occlusion in a chronic canine model. *Circulation* 2011;**123**:137–46.
  39. Herregods TV, Bredenoord AJ, Smout AJ. Pathophysiology of gastroesophageal reflux disease: new understanding in a new era. *Neurogastroenterol Motil* 2015;**27**:1202–13.
  40. Landmark K, Storstein O. Ectopic atrial tachycardia on swallowing. Report on favourable effect of verapamil. *Acta Med Scand* 1979;**205**:251–4.
  41. Schilling RJ, Kaye GC. Paroxysmal atrial flutter suppressed by repair of a large paraesophageal hernia. *Pacing Clin Electrophysiol* 1998;**21**:1303–5.
  42. Cristian DA, Constantin AS, Barbu M, Spătaru D, Burco T, Grama FA. Paroxysmal postprandial atrial fibrillation suppressed by laparoscopic repair of a giant paraesophageal hernia compressing the left atrium. *J Gastrointest Liver Dis* 2015;**24**:113–6.
  43. El-Serag HB, Graham DY, Satia JA, Rabaneck L. Obesity is an independent risk factor for GERD symptoms and erosive esophagitis. *Am J Gastroenterol* 2005;**100**:1243–50.
  44. Wong CX, Abed HS, Molaei P, Nelson AJ, Brooks AG, Sharma G et al. Pericardial fat is associated with atrial fibrillation severity and ablation outcome. *J Am Coll Cardiol* 2011;**57**:1745–51.
  45. Mahajan R, Lau DH, Brooks AG, Shipp NJ, Manavis J, Wood JP et al. Electrophysiological, electroanatomical, and structural remodeling of the atria as consequences of sustained obesity. *J Am Coll Cardiol* 2015;**66**:1–11.
  46. Pathak RK, Middeldorp ME, Lau DH, Mehta AB, Mahajan R, Twomey D et al. Aggressive risk factor reduction study for atrial fibrillation and implications for the outcome of ablation: the ARREST-AF cohort study. *J Am Coll Cardiol* 2014;**64**:2222–31.
  47. Abed HS, Wittert GA, Leong DP, Shirazi MG, Bahrami B, Middeldorp ME et al. Effect of weight reduction and cardiometabolic risk factor management on symptom burden and severity in patients with atrial fibrillation: a randomized clinical trial. *JAMA* 2013;**310**:2050–60.
  48. Taylor DJ, Mallory LJ, Lichstein KL, Durrence HH, Riedel BW, Bush AJ. Comorbidity of chronic insomnia with medical problems. *Sleep* 2007;**30**:213–8.
  49. Jung HK, Choung RS, Talley NJ. Gastroesophageal reflux disease and sleep disorders: evidence for a causal link and therapeutic implications. *Neurogastroenterol Motil* 2010;**16**:22–9.
  50. Green BT, Broughton WA, O'Connor JB. Marked improvement in nocturnal gastroesophageal reflux in a large cohort of patients with obstructive sleep apnea treated with continuous positive airway pressure. *Arch Intern Med* 2003;**163**:41–5.
  51. Linz D, Linz B, Hohl M, Böhm M. Atrial arrhythmogenesis in obstructive sleep apnea: Therapeutic implications. *Sleep Med Rev* 2015;**26**:87–94.
  52. Linz D, Hohl M, Nickel A, Mahfoud F, Wagner M, Ewen S et al. Effect of renal denervation on neurohumoral activation triggering atrial fibrillation in obstructive sleep apnea. *Hypertension* 2013;**62**:767–74.
  53. Dimitri H, Ng M, Brooks AG, Kuklik P, Stiles MK, Lau DH et al. Atrial remodeling in obstructive sleep apnea: implications for atrial fibrillation. *Heart Rhythm* 2011;**9**:321–7.
  54. Linz D, Hohl M, Ukena C, Mahfoud F, Wirth K, Neuberger HR et al. Obstructive respiratory events and premature atrial contractions after cardioversion. *Eur Respir J* 2015;**45**:1332–40.
  55. Kanagala R, Murali NS, Friedman PA, Ammass NM, Gersh BJ, Ballman KV et al. Obstructive sleep apnea and the recurrence of atrial fibrillation. *Circulation* 2003;**107**:2589–94.
  56. Fein AS, Shvilkin A, Shah D, Haffajee CI, Das S, Kumar K et al. Treatment of obstructive sleep apnea reduces the risk of atrial fibrillation recurrence after catheter ablation. *J Am Coll Cardiol* 2013;**62**:300–5.
  57. Linz D, Woehrl H, Bitter T, Fox H, Cowie MR, Böhm M et al. The importance of sleep-disordered breathing in cardiovascular disease. *Clin Res Cardiol* 2015;**104**:705–18.
  58. Li L, Wang ZW, Li J, Ge X, Guo LZ, Wang Y et al. Efficacy of catheter ablation of atrial fibrillation in patients with obstructive sleep apnoea with and without continuous positive airway pressure treatment: a meta-analysis of observational studies. *Europace* 2014;**16**:1309–14.
  59. Penzel T, Becker HF, Brandenburg T, Labunski T, Pankow W, Peter JH. Arousal in patients with gastro-oesophageal reflux and sleep apnoea. *Eur Respir J* 1999;**14**:1266–70.
  60. Pattanshetty DJ, Anna K, Gajulapalli RD, Sappati-Biyani RR. Inflammatory bowel 'Cardiac' disease: point prevalence of atrial fibrillation in inflammatory bowel disease population. *Saudi J Gastroenterol* 2015;**21**:325–9.
  61. Kristensen SL, Lindhardsen J, Ahlehoff O, Erichsen R, Lamberts M, Khalid U et al. Increased risk of atrial fibrillation and stroke during active stages of inflammatory bowel disease: a nationwide study. *Europace* 2014;**16**:477–84.
  62. Dogan Y, Soyulu A, Eren GA, Poturoglu S, Dolapcioglu C, Sonmez K et al. Evaluation of QT and P wave dispersion and mean platelet volume among inflammatory bowel disease patients. *Int J Med Sci* 2011;**8**:540–6.
  63. Emilsson L, Smith JG, West J, Melander O, Ludvigsson JF. Increased risk of atrial fibrillation in patients with coeliac disease: a nationwide cohort study. *Eur Heart J* 2011;**32**:2430–7.
  64. Lebowitz B, Emilsson L, Fröbert O, Einstein AJ, Green PH, Ludvigsson JF. Mucosal healing and the risk of ischemic heart disease or atrial fibrillation in patients with celiac disease: a population-based study. *PLoS One* 2015;**10**:e0117529.
  65. Bayar N, Çekin AH, Arslan S, Çağırıcı G, Erkal Z, Çay S et al. Assessment of left atrial function in patients with celiac disease. *Echocardiography* 2015;**32**:1802–8.
  66. Efe TH, Ertem AG, Coskun Y, Bilgin M, Algul E, Beton O et al. Atrial electromechanical properties in coeliac disease. *Heart Lung Circ* 2016;**25**:160–5.
